# Supplementary material
Source: publisher figshare collection journal article supplement (https://rs.figshare.com/ndownloader/files/13643402)
Supplement: Supplementary file 1 [file 13643402]

	Vial	Genotype	Type	observation.total	court.m-f	court.m-m	aggre.m-m	aggre.m-f	mating.total
1	CTF/1	control-traF	Control	1365	30	0	14	0	0
2	CTF/2	control-traF	Control	1490	37	0	37	0	0
3	CTF/3	control-traF	Control	1545	20	0	2	0	0
4	CTF/4	control-traF	Control	1365	29	4	38	0	0
5	CTF/5	control-traF	Control	1570	41	0	21	0	0
6	CTF/6	control-traF	Control	1650	27	0	12	0	0
7	CTF/7	control-traF	Control	1525	16	0	22	0	0
8	ecm/1	control-elav	Control	1180	26	0	18	0	0
9	ecm/2	control-elav	Control	1650	34	2	13	0	0
10	ecm/3	control-elav	Control	1465	32	0	18	0	0
11	ecm/4	control-elav	Control	1445	27	0	19	0	0
12	ecm/5	control-elav	Control	1400	36	0	9	0	0
13	ecm/6	control-elav	Control	1245	45	0	20	0	1
14	ecm/7	control-elav	Control	1400	53	0	33	0	0
15	eTF/1	Feminised	Experimental	1555	157	214	11	0	0
16	eTF/2	Feminised	Experimental	1035	94	206	3	1	0
17	eTF/3	Feminised	Experimental	1465	138	241	5	1	0
18	eTF/4	Feminised	Experimental	980	109	131	14	2	0
19	eTF/5	Feminised	Experimental	1380	163	182	4	0	0
20	eTF/6	Feminised	Experimental	1325	107	135	6	0	0
